# Supplementary material for: Predictors of long-term clinical response in patients with non-radiographic axial spondyloarthritis receiving certolizumab pegol
Source: PubMed Central journal article supplement (PMC8556993; doi:10.1186/s13075-021-02650-4), 2021-10-29
Supplement: 13075_2021_2650_MOESM1_ESM.pdf [file 13075_2021_2650_MOESM1_ESM.pdf]

## SUPPLEMENTARY APPENDIX

### Predictive factors evaluated in the prediction model:

#### *Baseline demographics and characteristics*

Age (years)  
Sex (male/female)  
BMI (<18.5, 18.5≥BMI<25, 25≥BMI<30, ≥30)  
Symptom duration (<5 years, ≥5 years)  
Time since diagnosis (<5 years, ≥5 years)  
CRP (≤ULN, >ULN)  
MRI (+,-)  
HLA-B27 (+,-)  
MRI/HLA-B27 combined (MRI+/HLA-B27+, MRI+/HLA-B27-,  
MRI-/HLA-B27+)  
Swollen Joint Count>0 (yes, no)  
MASES>0 (yes, no)  
Prior DMARDs (yes, no)  
Concomitant DMARDs at baseline (yes, no)  
Prior use of NSAIDs (≤2, >2)  
ASDAS  
BASDAI  
BASFI  
BASMI  
SI joint SPARCC Score  
Patient global assessment of disease activity  
Total spinal pain  
Nocturnal pain  
ASQoL

#### *Week 12 responses*

ASDAS-MI (yes, no)  
ASDAS-ID (yes, no)  
ASAS40 (yes, no)  
BASDAI50 (yes, no)

**Permitted concomitant medications:**

Non-biologic background medication permitted during C-axSpAnd included:

- Non-steroidal anti-inflammatory drugs (including COX-2 inhibitors)
- Opioid and non-opioid analgesics (including, but not limited to paracetamol and opiates)
- Conventional synthetic disease-modifying antirheumatic drugs (including sulfasalazine, hydrochloroquine, methotrexate, leflunomide and azathioprine)
- Disease-modifying antirheumatic drugs (including cyclosporine, cyclophosphamide, mycophenolic acid and apremilast)
- Hyaluronic acid
- Oral and intravenous corticosteroids

**Figure S1.** Univariate analyses of Week 12 predictors of response in CZP-treated patients (n=159)

**A) Predictive factors for ASDAS-MI**

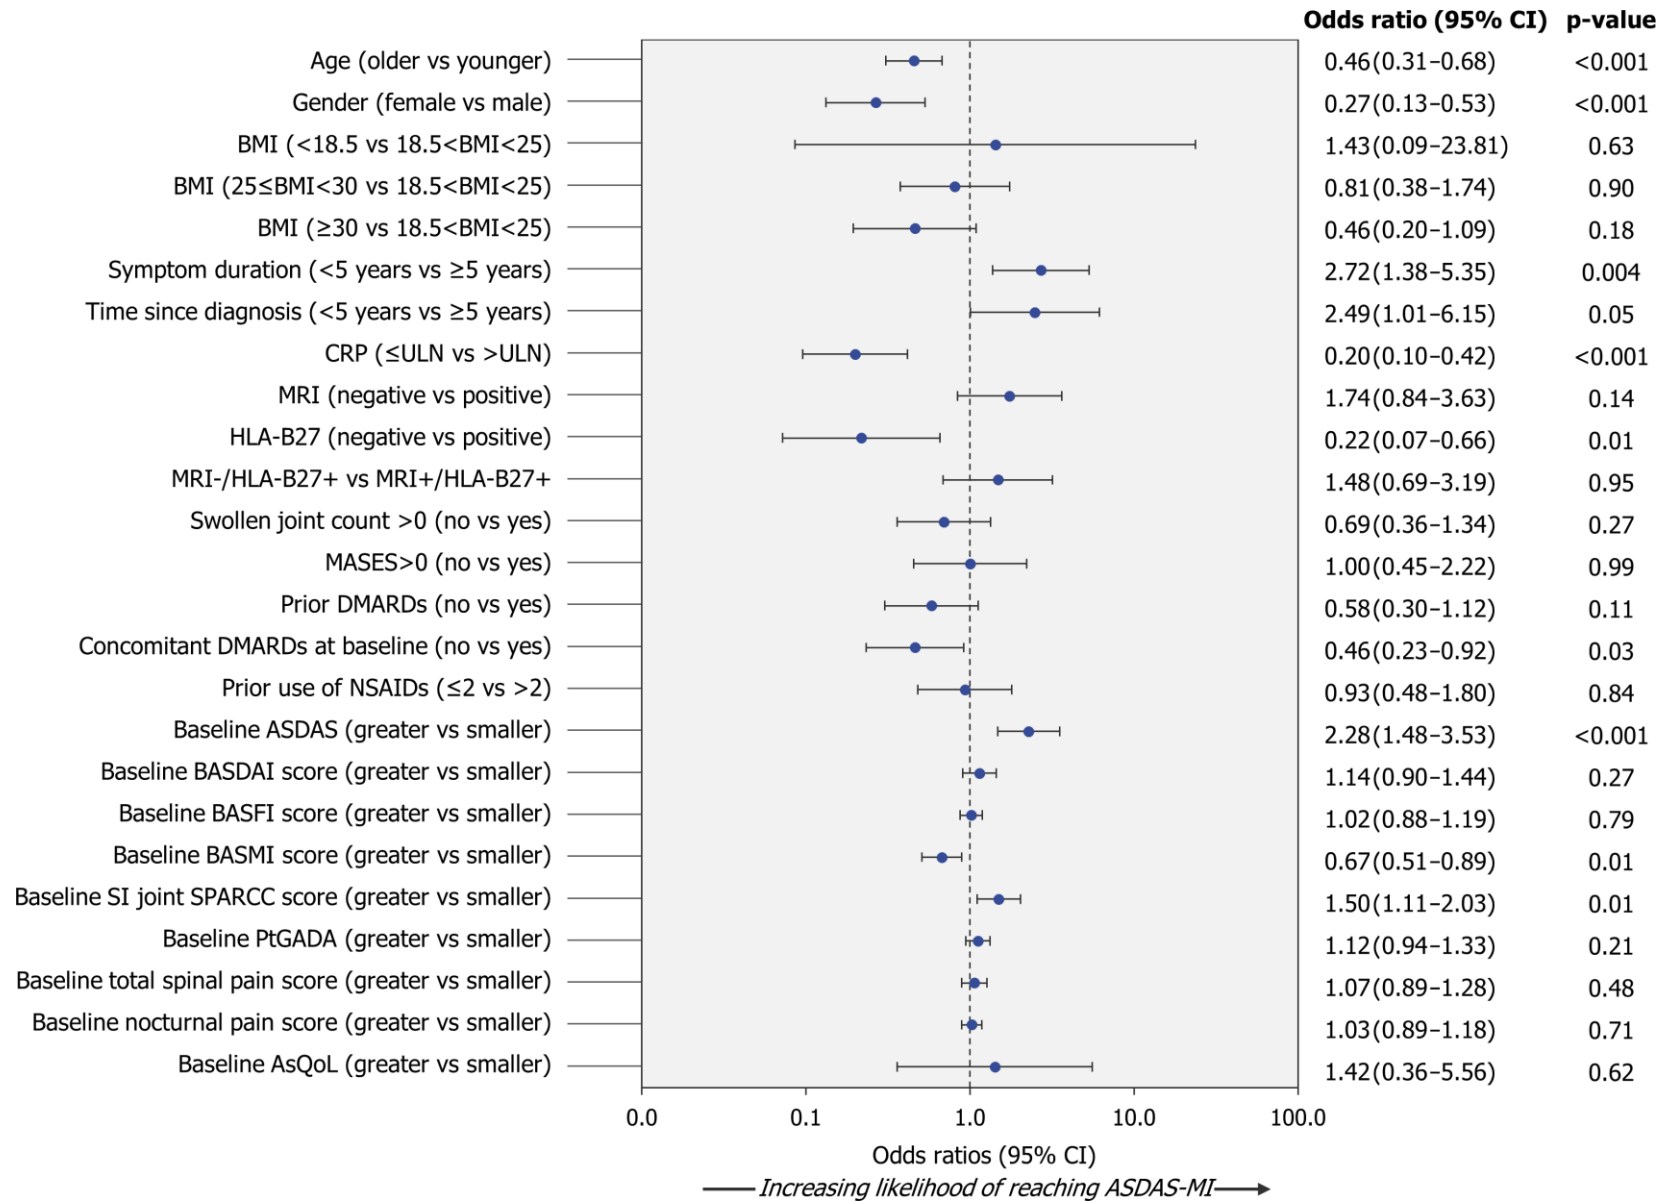

## B) Predictive factors for ASAS40

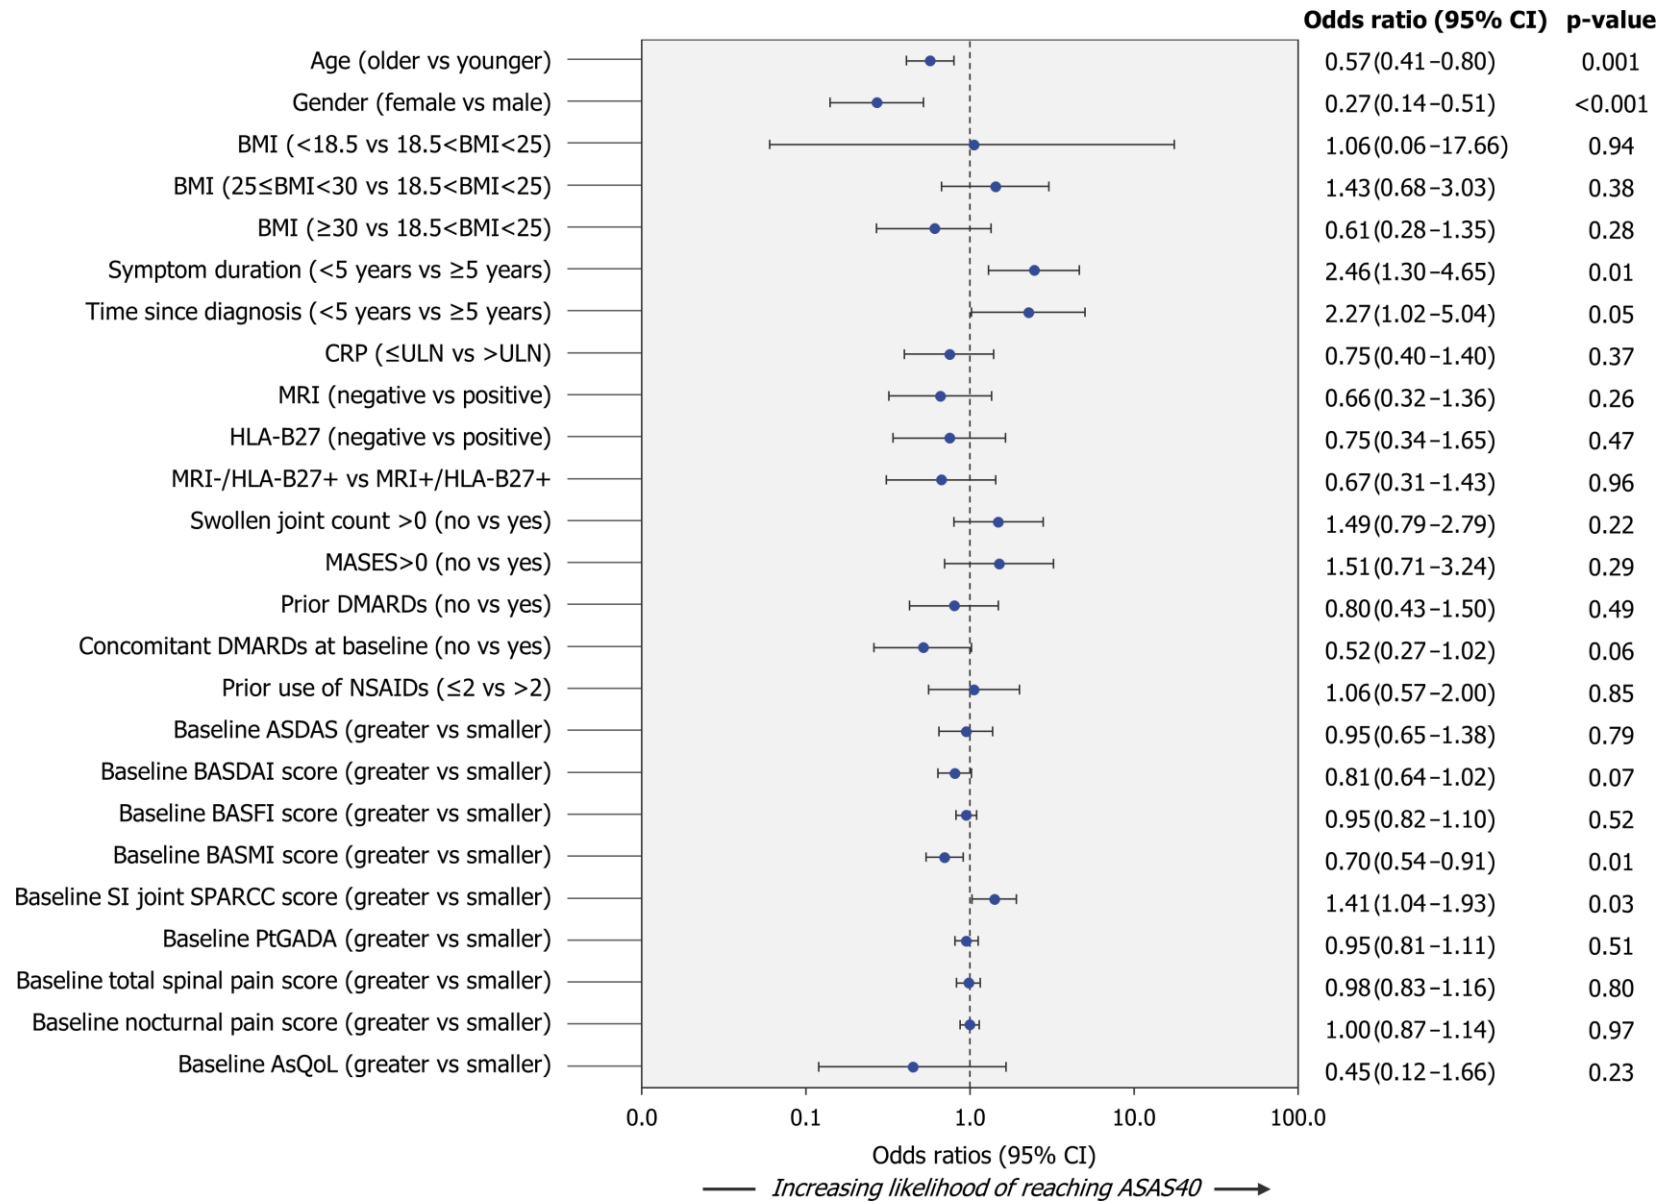

### C) Predictive factors for BASDAI50

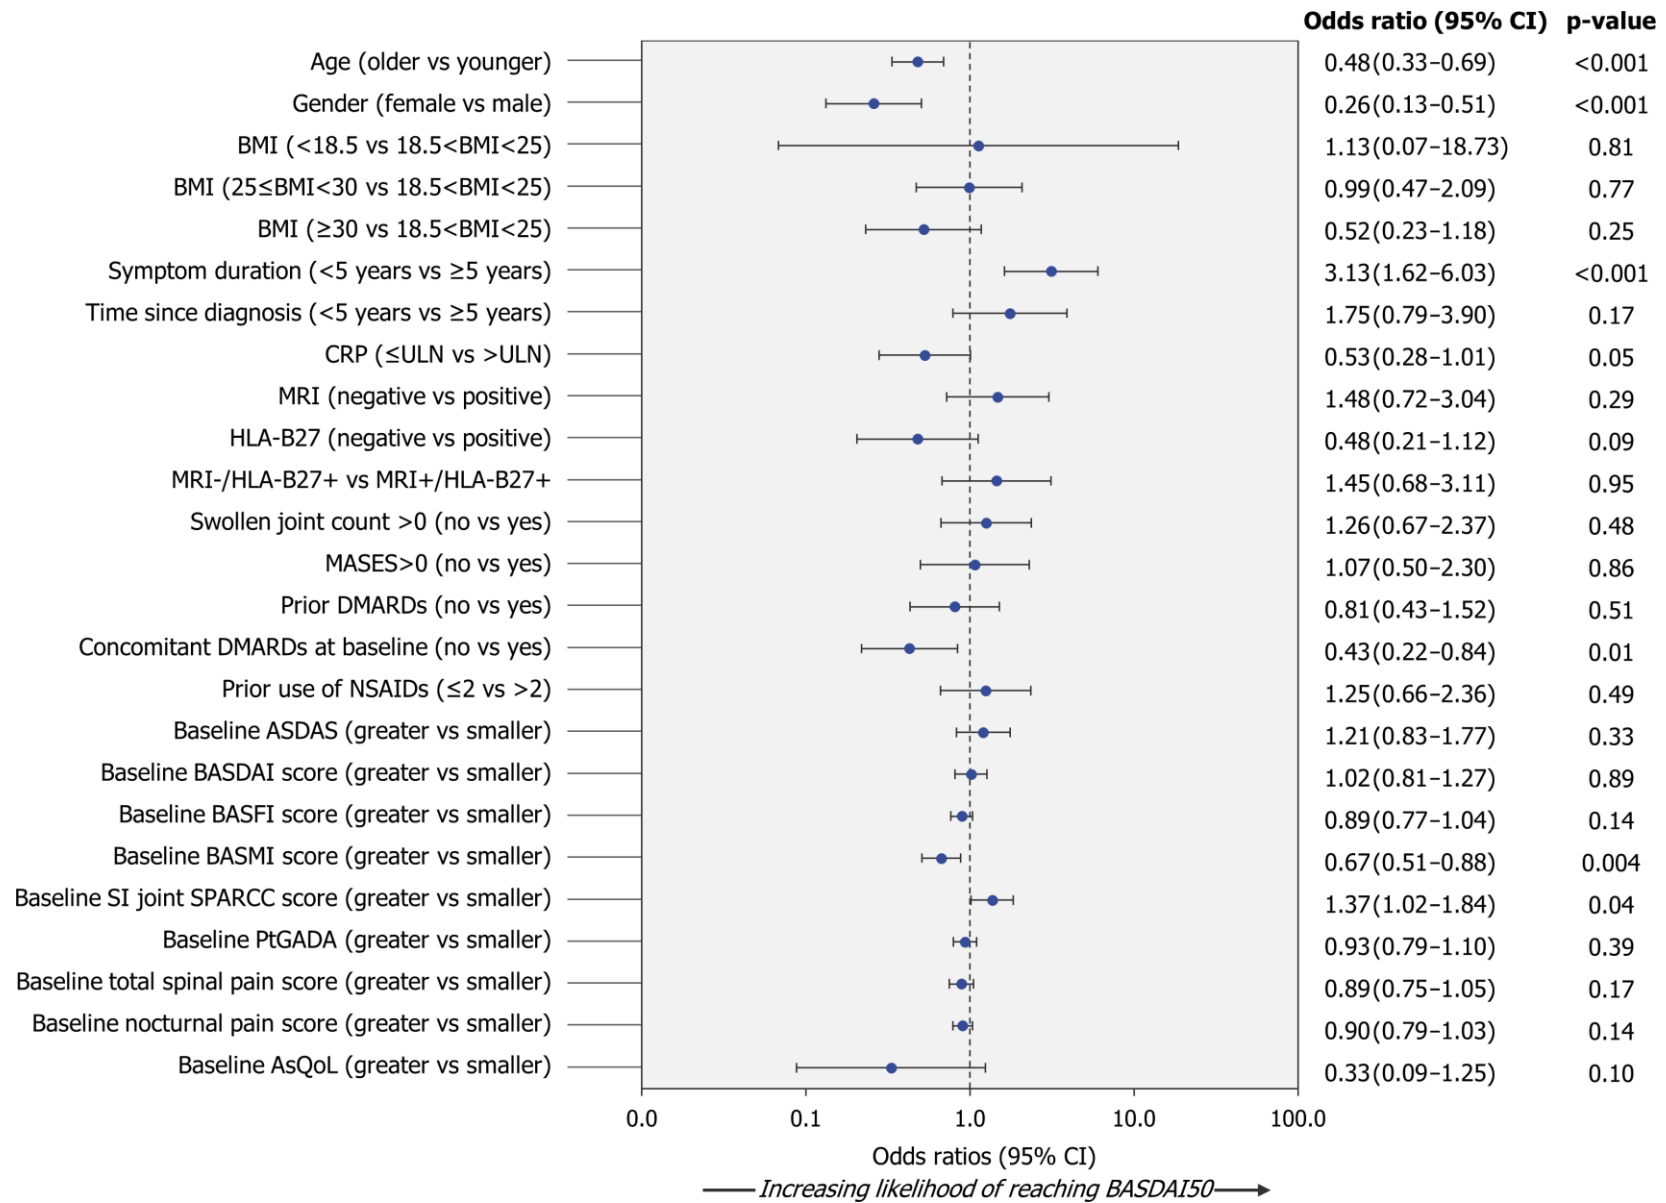

## D) Predictive factors for ASDAS-ID

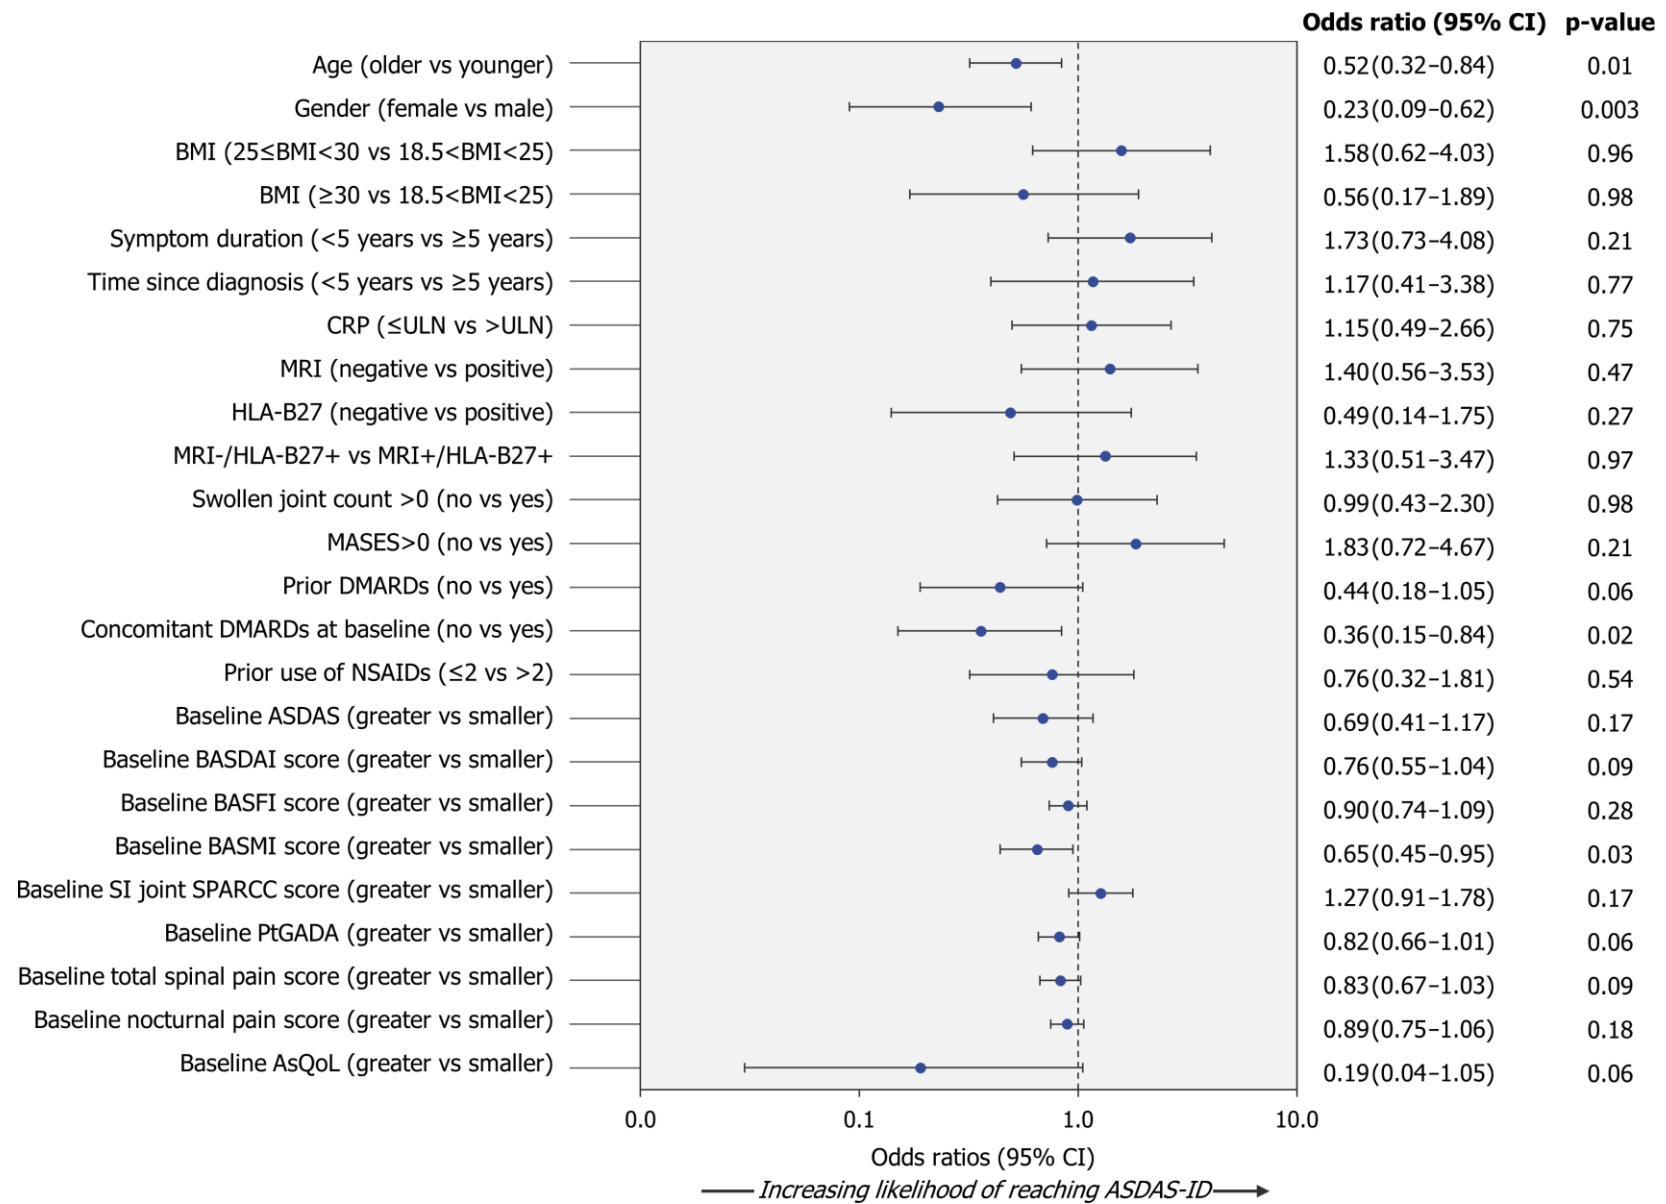

Full Analysis set (n=159). Patients received CZP 200 mg Q2W (400 mg loading dose at Weeks 0, 2 and 4) plus non-biologic background medication. Variables with 95% CI that were <0.0001 or >999.9 are excluded. 95% CI and p-values are considered non-confirmatory due to the exploratory nature of the analysis. ASAS40: Assessment of SpondyloArthritis International Society 40%; ASDAS: Ankylosing Spondylitis Disease Activity Score; ASDAS-ID: ASDAS inactive disease (ASDAS<1.3); ASDAS-MI: ASDAS major improvement (reduction in ASDAS≥2.0); ASQoL: ankylosing spondylitis quality of life; BASDAI50: Bath Ankylosing Spondylitis Disease Activity Index 50%; BASFI: Bath Ankylosing Spondylitis Functional Index; BASMI: Bath Ankylosing Spondylitis Metrology Index; BMI: body mass index; CI: confidence interval; CRP: C-reactive protein; CZP: certolizumab pegol; DMARD: disease-modifying antirheumatic drug; HLA-B27: human leukocyte antigen-B27; MRI+/-: presence/absence of sacroiliitis on magnetic resonance imaging; MASES: Maastricht Ankylosing Spondylitis Enthesitis Score (range 0–13); NRI: non-responder imputation; NSAID: non-steroidal anti-inflammatory drug; PtGADA: Patient Global Assessment of Disease Activity; Q2W: every 2 weeks; SPARCC: Spondyloarthritis Research Consortium of Canada; vs: versus.

**Figure S2.** Univariate analyses of Week 52 predictors of response in CZP-treated patients (n=159)

**A) Predictive factors for ASDAS-MI**

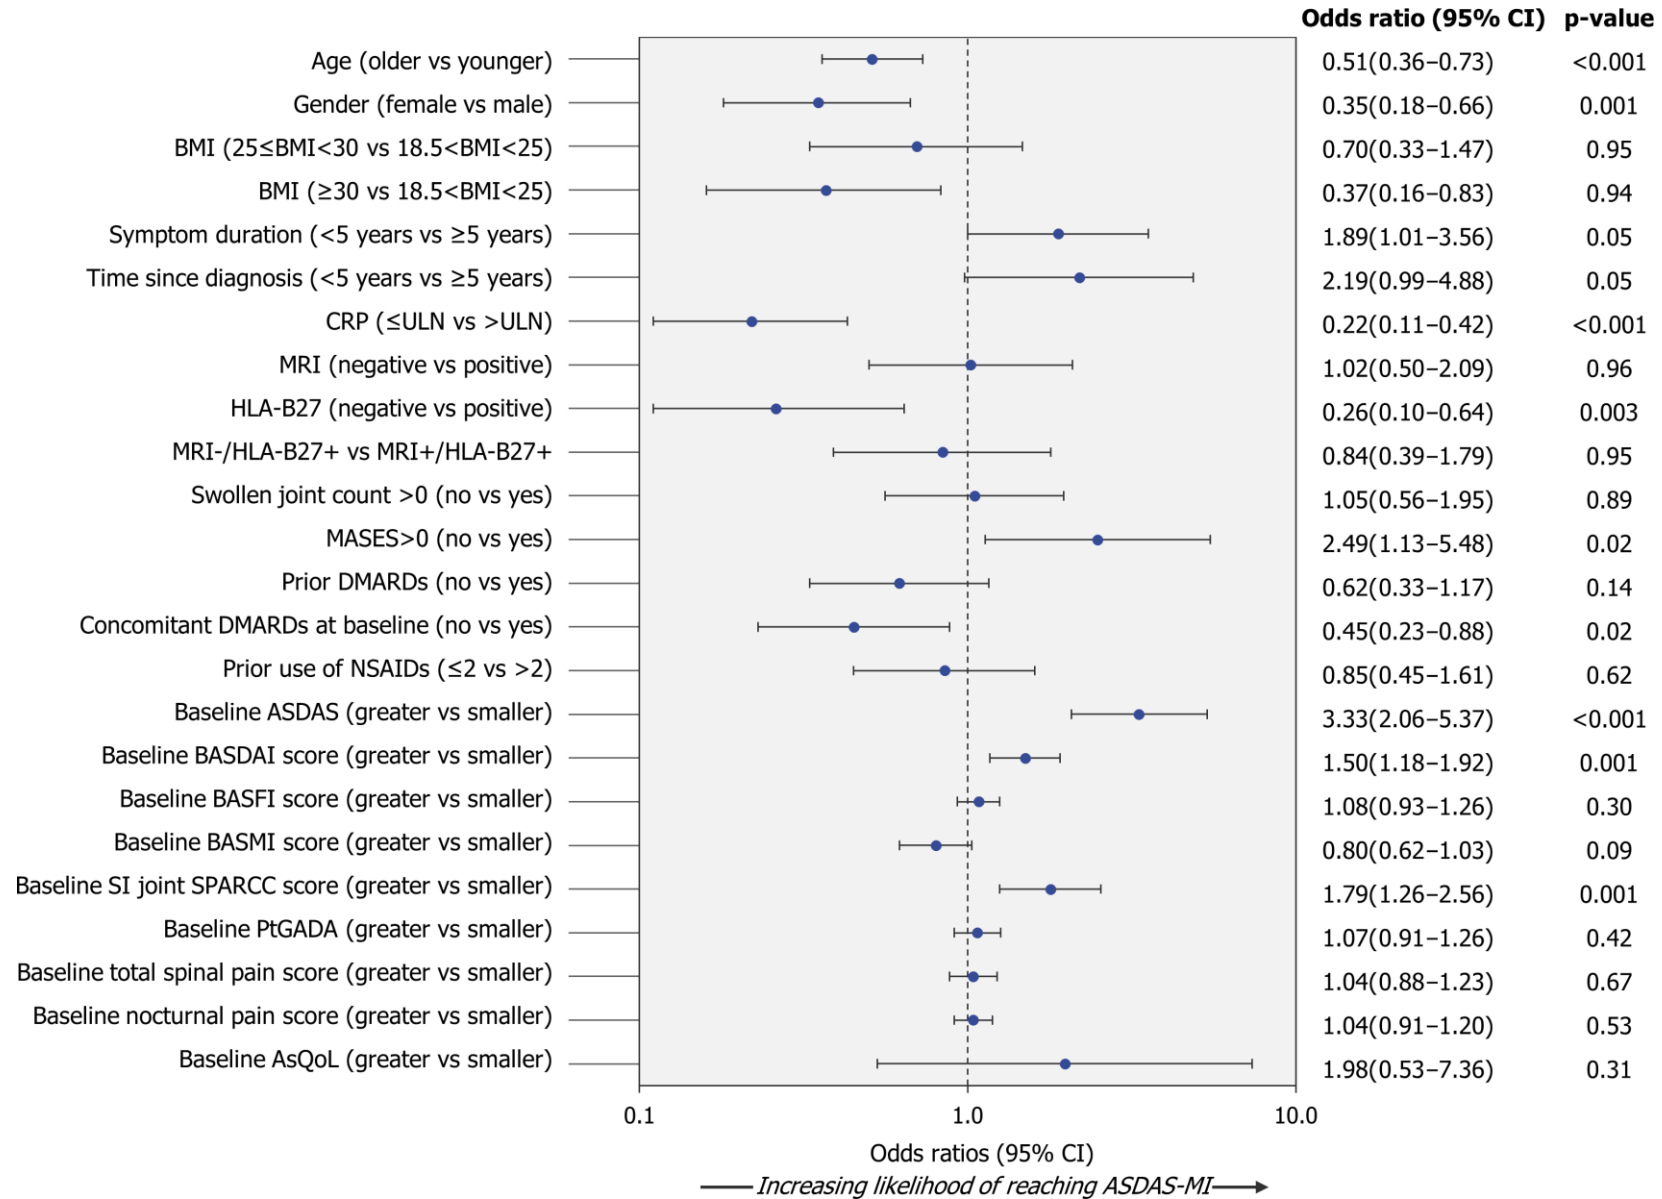



## B) Predictive factors for ASAS40

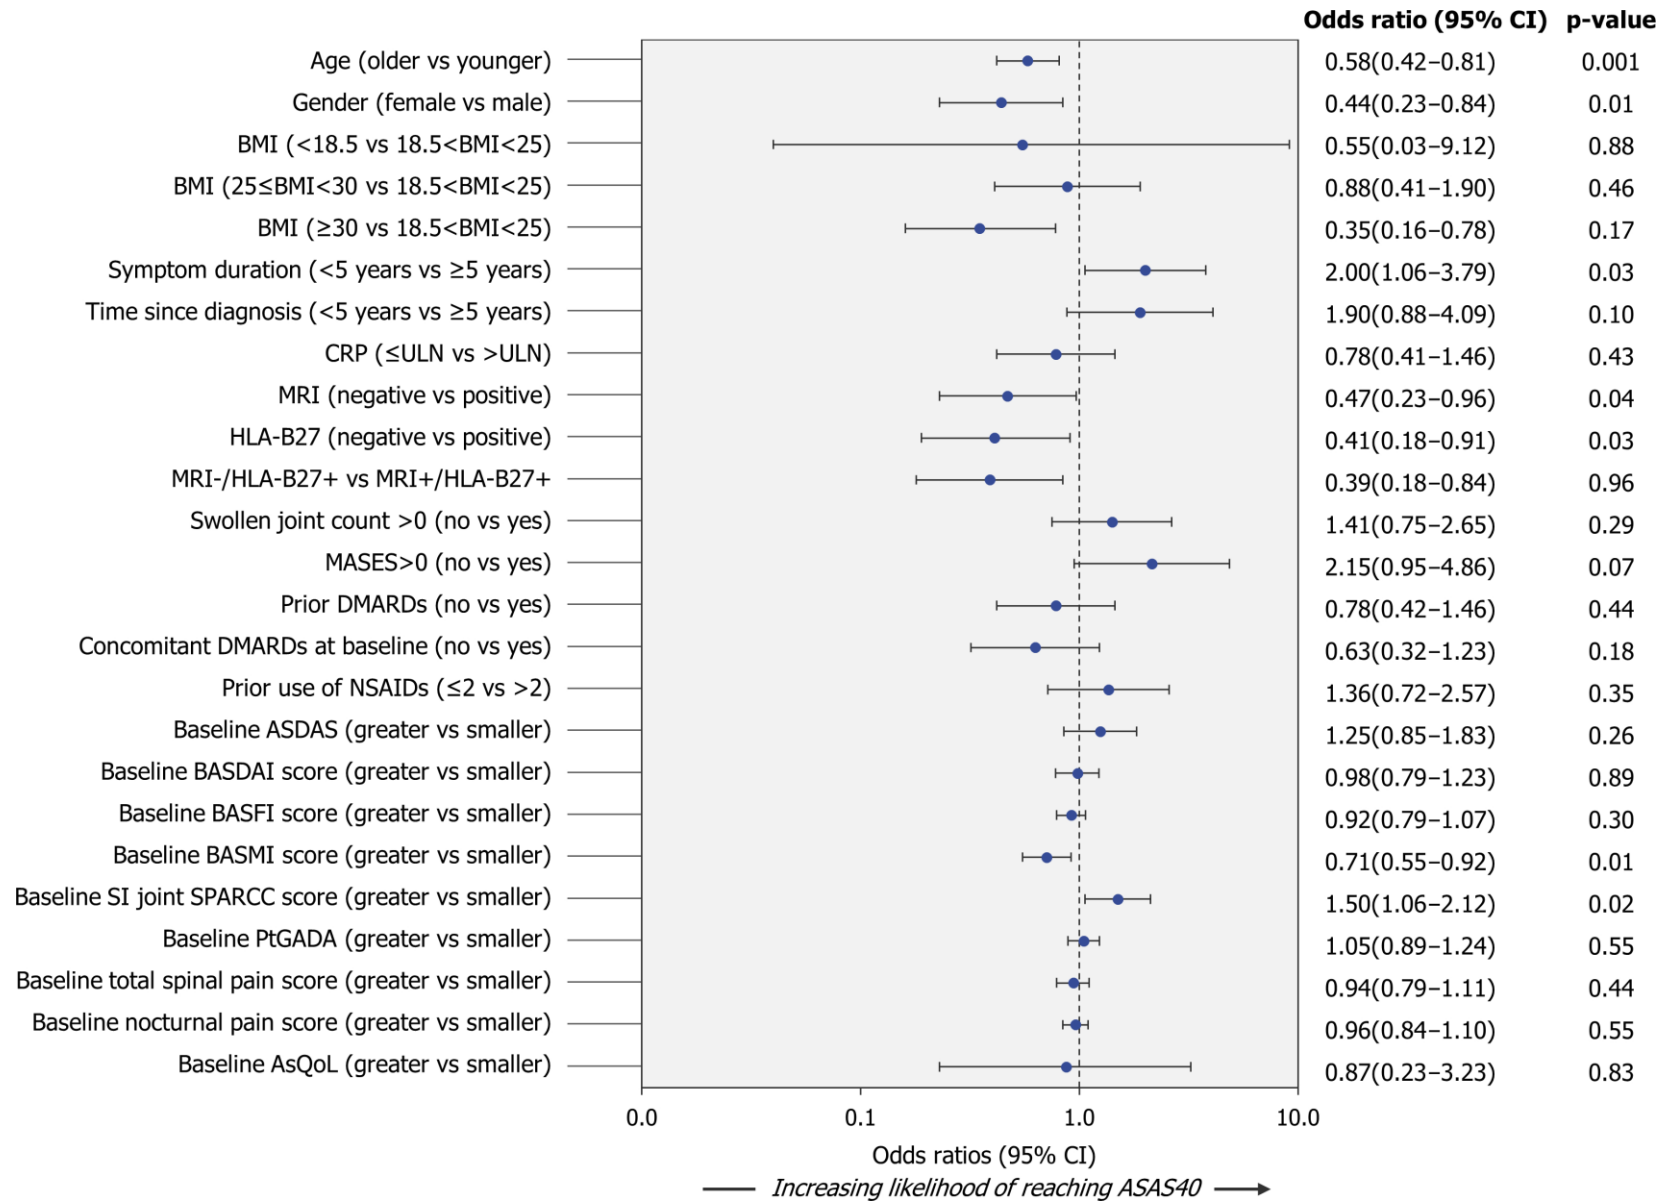

### C) Predictive factors for BASDAI50

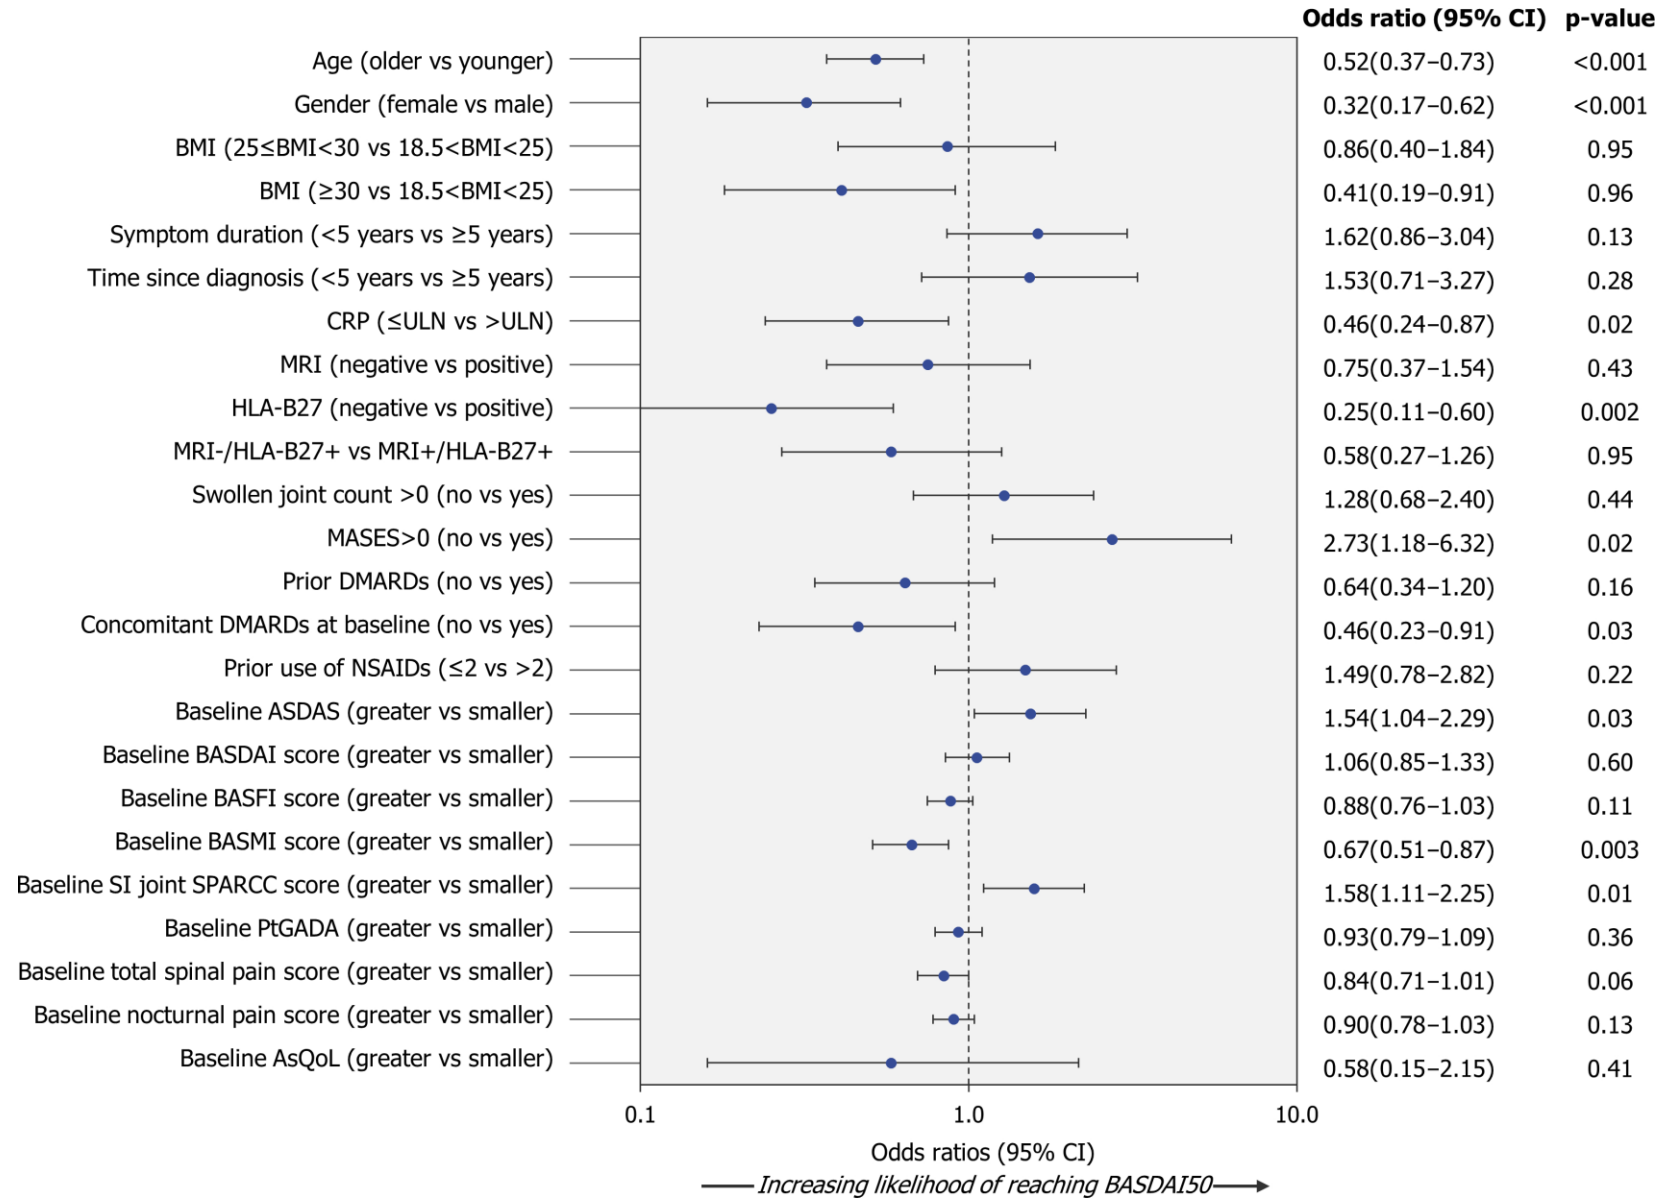

## D) Predictive factors for ASDAS-ID

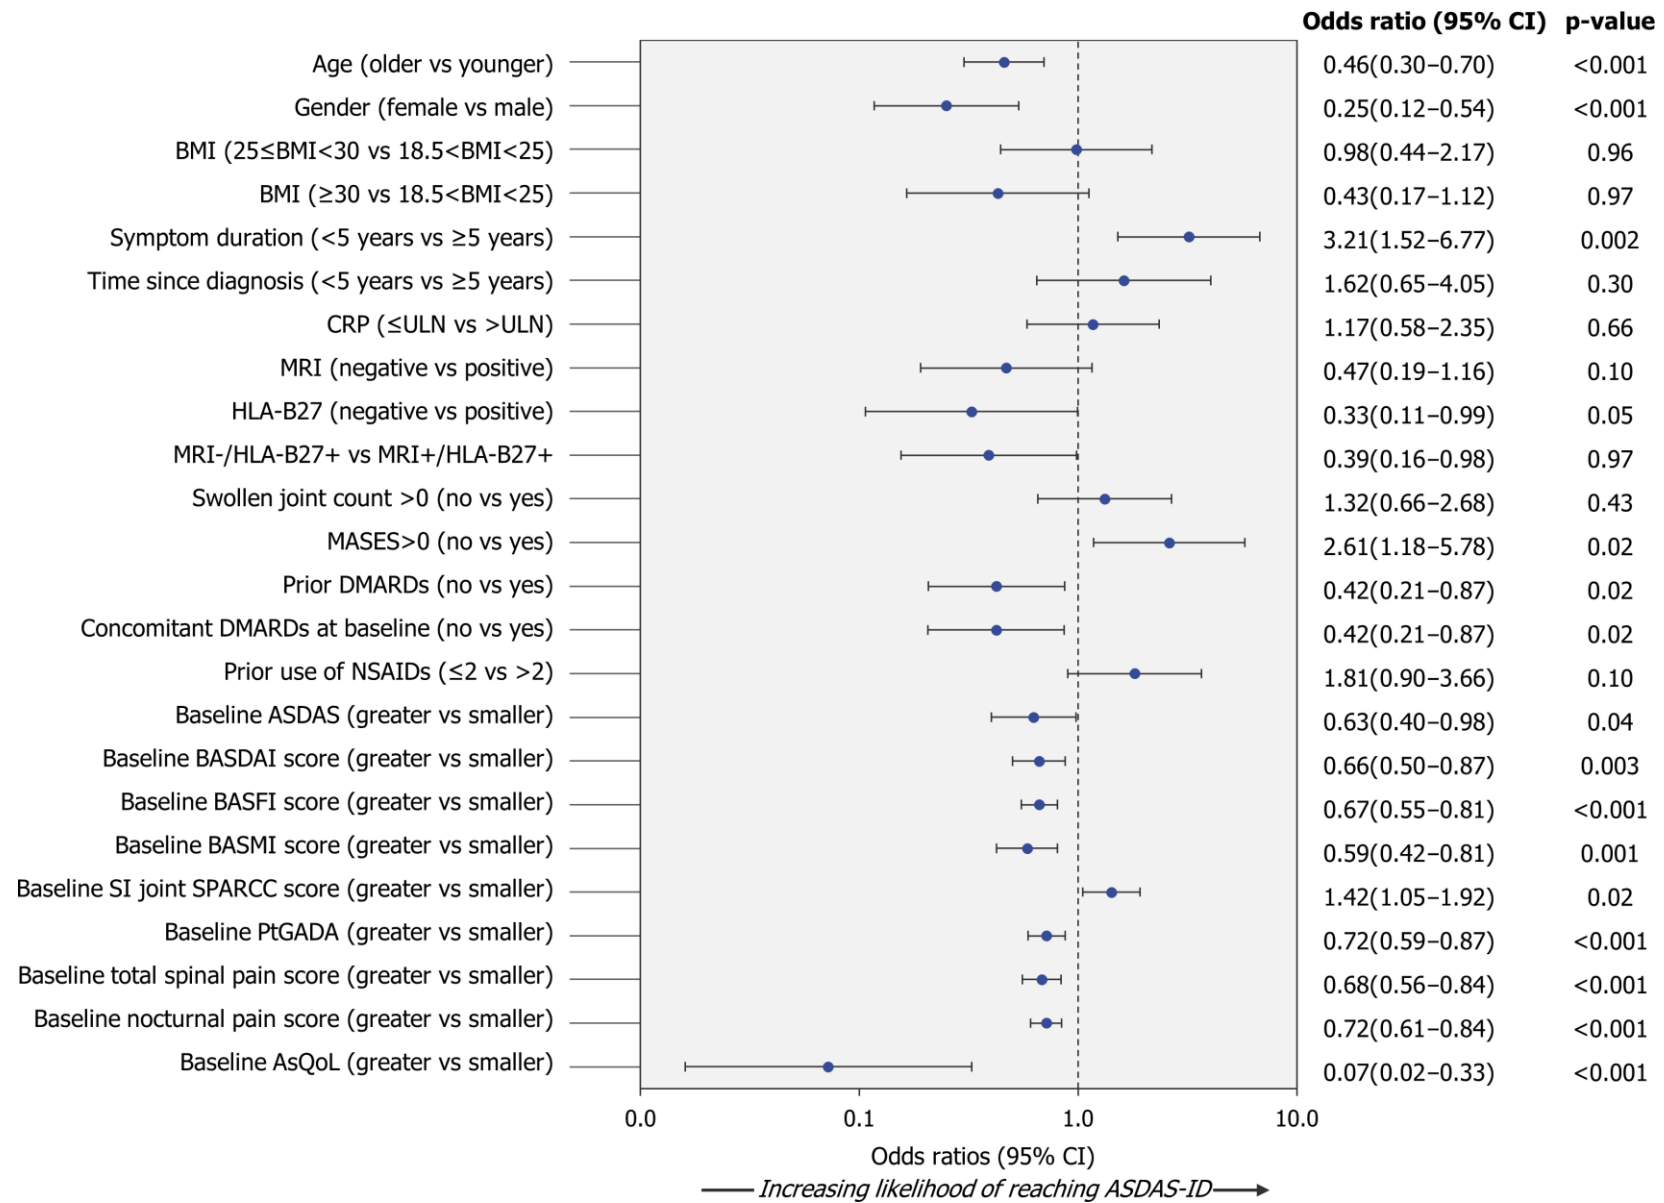

Full Analysis set (n=159). Patients received CZP 200 mg Q2W (400 mg loading dose at Weeks 0, 2 and 4) plus non-biologic background medication. Variables with 95% CI that were <0.0001 or >999.9 are excluded. 95% CI and p-values are considered non-confirmatory due to the exploratory nature of the analysis. ASAS40: Assessment of SpondyloArthritis International Society 40%; ASDAS: Ankylosing Spondylitis Disease Activity Score; ASDAS-ID: ASDAS inactive disease (ASDAS<1.3); ASDAS-MI: ASDAS major improvement (reduction in ASDAS≥2.0); ASQoL: ankylosing spondylitis quality of life; BASDAI50: Bath Ankylosing Spondylitis Disease Activity Index 50%; BASFI: Bath Ankylosing Spondylitis Functional Index; BASMI: Bath Ankylosing Spondylitis Metrology Index; BMI: body mass index; CI: confidence interval; CRP: C-reactive protein; CZP: certolizumab pegol; DMARD: disease-modifying antirheumatic drug; HLA-B27: human leukocyte antigen-B27; MRI+/-: presence/absence of sacroiliitis on magnetic resonance imaging; MASES: Maastricht Ankylosing Spondylitis Enthesitis Score (range 0–13); NRI: non-responder imputation; NSAID: non-steroidal anti-inflammatory drug; PtGADA: Patient Global Assessment of Disease Activity; Q2W: every 2 weeks; SPARCC: Spondyloarthritis Research Consortium of Canada; vs: versus.

**Figure S3.** Predictive factors of Week 52 response in CZP-treated patients who did not experience changes in background medication

**A) Predictive factors for ASDAS-MI**

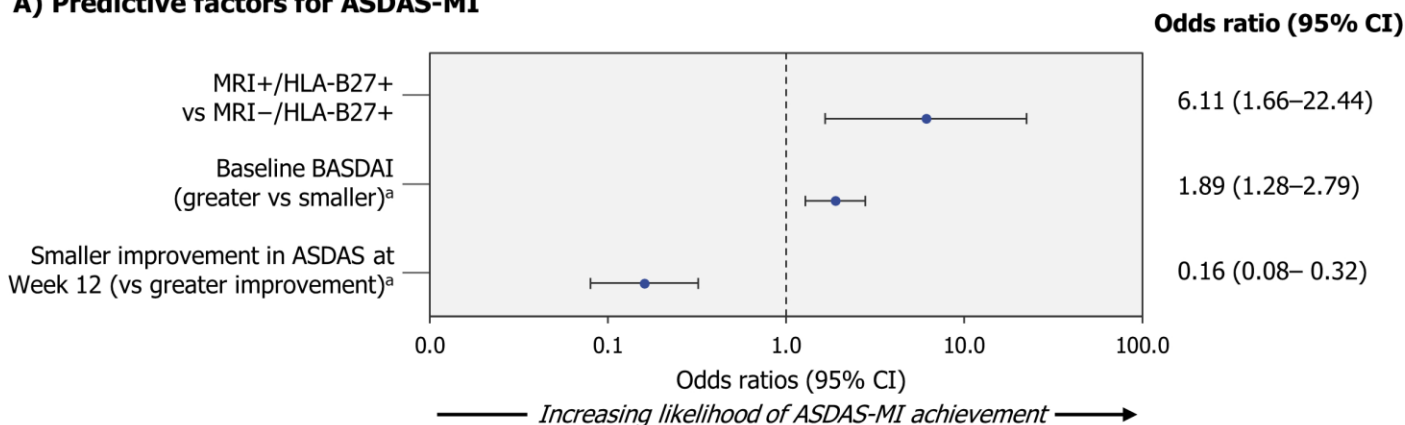

**B) Predictive factors for ASAS40**

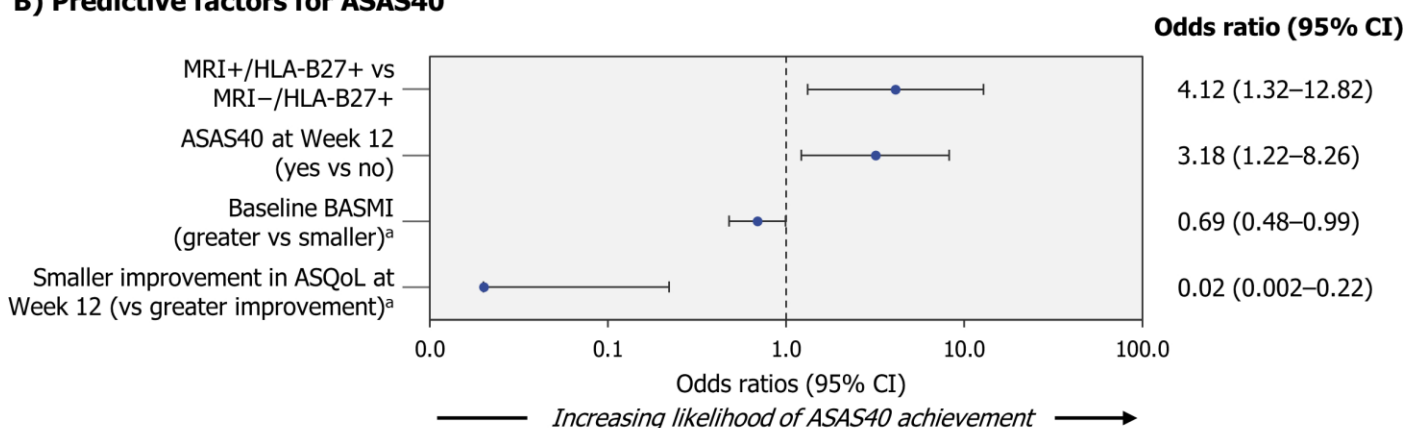

**C) Predictive factors for BASDAI50**

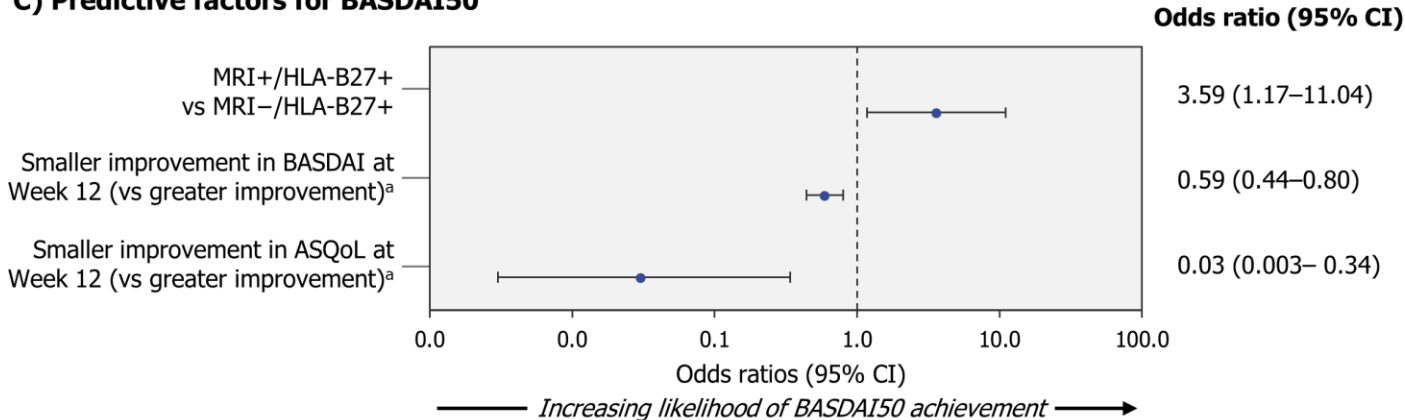

**D) Predictive factors for ASDAS-ID**

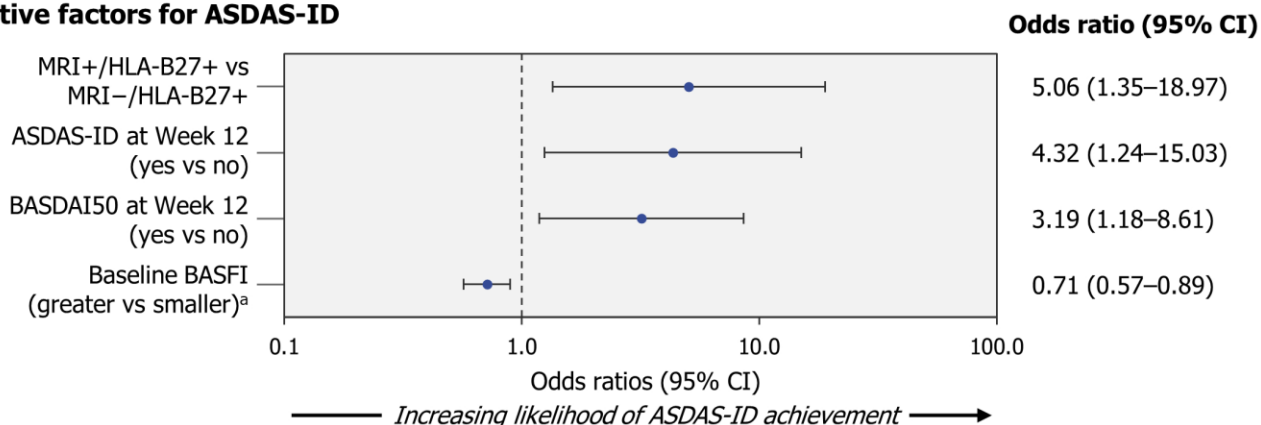

Randomised Set (NRI). Patients received CZP 200 mg Q2W (400 mg loading dose at Weeks 0, 2 and 4) plus non-biologic background medication. Analysis excludes patients who experienced any change in background medication. <sup>a</sup>Included in the predictive model as continuous variables; for these factors, an odds ratio >1 indicates a higher probability of larger values being predictive of a response. For Week 12 change from baseline measures, a lower (negative) value is indicative of improvement, while larger (positive) values indicate worsening. ASAS40: Assessment of SpondyloArthritis International Society 40%; ASDAS: Ankylosing Spondylitis Disease Activity Score; ASDAS-ID: ASDAS inactive disease (ASDAS<1.3); ASDAS-MI: ASDAS major improvement (reduction in ASDAS≥2.0); ASQoL: ankylosing spondylitis quality of life; BASDAI50: Bath Ankylosing Spondylitis Disease Activity Index 50%; BASFI: Bath Ankylosing Spondylitis Functional Index; BASMI: Bath Ankylosing Spondylitis Metrology Index; CI: confidence interval; CZP: certolizumab pegol; HLA-B27: human leukocyte antigen-B27; MRI+/-: presence/absence of sacroiliitis on magnetic resonance imaging; NRI: non-responder imputation; Q2W: every 2 weeks; vs: versus.
